# Supplementary material for: Massively Parallel Sequencing of Genes Implicated in Heritable Cardiac Disorders: A Strategy for a Small Diagnostic Laboratory
Source: Med Sci (Basel). 2017 Oct 10;5(4):22. doi: 10.3390/medsci5040022 (PMC5753651; doi:10.3390/medsci5040022)
Supplement: Supplementary file 1 [file medsci-05-00022-s001.zip › Supplementary data 2.xlsx]

## Sheet: Agilent It 1
	Total #	Breakdown				SureCall					JSI
		Missense	Dels	Insertions/dups	Intronic	Total #	Missense	Dels	Insertions/dups	Intronic	Total #	Missense	Dels	Insertions/dups	Intronic
Ag 1	10	9			1	10	9			1	10	9			1
Ag 2	10	8			2	10	8			2	10	8			2
Ag 3	15	8			7	15	8			7	15	8			7
Ag 4	14	8			6	14	8			6	14	8			6
Ag 5	10	9			1	10	9			1	10	9			1
Ag 6 *	17	14	1		2	17	14	1		2	17	14	1		2
Ag 7	9	6	2		1	9	6	2		1	9	6	2		1
Ag 8	9	8	1			9	8	1			9	8	1
Ag 9	5	3	1		1	5	3	1		1	5	3	1		1
Ag 10	11	9	1		1	11	9	1		1	11	9	1		1
Ag 11	12	10	1		1	12	10	1		1	12	10	1		1
Ag 12	12	11			1	12	11			1	12	11			1
Ag 13	2		1	1		1		1			2		1	1
Ag 14 *	10	8			2	10	8			2	10	8			2
Ag 15	14	11	1		2	14	11	1		2	14	11	1		2
Ag 16	11	10			1	11	10			1	11	10			1
Total	171	132	9	1	29	170	132	9	0	29	171	132	9	1	29
*	Inter/intra run controls
	Samples with unique variants required to satisfy the ACSG guidelines

## Sheet: Agilent It 2
	Total #	Breakdown				SureCall					JSI
		Missense	Dels	Insertions/dups	Intronic	Total #	Missense	Dels	Insertions/dups	Intronic	Total #	Missense	Dels	Insertions/dups	Intronic
Ag 17	1		1			1		1			1		1
Ag 18	2			1	1	2			1	1	2			1	1
Ag 19	66	50	2	1	13	66	50	2	1	13	65	49	2	1	13
Ag 20	30	26	1		3	30	26	1		3	30	26	1		3
Ag 21	11	7	2		2	11	7	2		2	11	7	2		2
Ag 22	1			1		1			1		1			1
Ag 23 *	10	8			2	10	8			2	10	8			2
Ag 24 *	10	8			2	10	8			2	10	8			2
Ag 25	1	1				1	1				1	1
Ag 26	1	1				1	1				1	1
Ag 27	1	1				1	1				1	1
Ag 28	20	11			9	20	11			9	20	11			9
Ag 29	35	30	2		3	35	30	2		3	35	30	2		3
Ag 30	17	9			8	17	9			8	17	9			8
Ag 31 *	10	8			2	10	8			2	10	8			2
Ag 32 *	17	14	1		2	17	14	1		2	17	14	1		2
Ag 33	1			1		1			1		1			1
Ag 34	2	2				2	2				2	2
Ag 35	1		1			1		1			1		1
Ag 36	33	27	3		3	33	27	3		3	33	27	3		3
Ag 37	11	6	4		1	11	6	4		1	11	6	4		1
Ag 38	13	9	3		1	13	9	3		1	13	9	3		1
Ag 39 *	17	14	1		2	17	14	1		2	17	14	1		2
Ag 40 *	10	8			2	10	8			2	10	8			2
Ag 41	1		1			1		1			1		1
Ag 42	11	11				11	11				11	11
Ag 43	36	30	2		4	36	30	2		4	36	30	2		4
Ag 44	17	12	3		2	17	12	3		2	17	12	3		2
Ag 45	6	6				6	6				6	6
Ag 46	8	7			1	8	7			1	8	7			1
Ag 47 *	10	8			2	10	8			2	10	8			2
Ag 48 *	10	8			2	10	8			2	10	8			2
Total	420	322	27	4	67	420	322	27	4	67	419	321	27	4	67
*	Inter/intra run controls
	Samples with unique variants required to satisfy the ACSG guidelines

## Sheet: Agilent It 3
	Total #	Breakdown				SureCall					JSI
		Missense	Dels	Insertions/dups	Intronic	Total	Missense	Dels	Insertions/dups	Intronic	Total	Missense	Dels	Insertions/dups	Intronic
Ag 49	10	9			1	10	9			1	10	9			1
Ag 50	15	11	2		2	15	11	2		2	15	11	2		2
Ag 51	10	10				10	10				10	10
Ag 52	1		1			1		1			1		1
Ag 53	9	5	2		2	9	5	2		2	9	5	2		2
Ag 54	1	1				1	1				1	1
Ag 55 *	10	8			2	10	8			2	10	8			2
Ag 56 *	10	8			2	10	8			2	10	8			2
Ag 57	11	8	1		2	11	8	1		2	11	8	1		2
Ag 58	9	7		1	1	9	7		1	1	9	7		1	1
Ag 59	13	8	2	1	2	13	8	2	1	2	13	8	2	1	2
Ag 60	5	3	1		1	5	3	1		1	5	3	1		1
Ag 61	15	10	2	1	2	15	10	2	1	2	15	10	2	1	2
Ag 62	1			1		1			1		1			1
Ag 63 *	17	14	1		2	17	14	1		2	17	14	1		2
Ag 64 *	10	8			2	10	8			2	10	8			2
Ag 65	11	9			2	11	9			2	11	9			2
Ag 66	10	9		1		10	9		1		10	9		1
Ag 67	12	9	1		2	12	9	1		2	12	9	1		2
Ag 68	32	27	2	1	2	32	27	2	1	2	32	27	2	1	2
Ag 69	12	9	2		1	12	9	2		1	12	9	2		1
Ag 70	2	2				2	2				2	2
Ag 71 *	17	14	1		2	17	14	1		2	17	14	1		2
Ag 72 *	10	8			2	10	8			2	10	8			2
Ag 73	9	5	2		2	9	5	2		2	9	5	2		2
Ag 74	7	6	1			7	6	1			7	6	1
Ag 75	7	4	2		1	7	4	2		1	7	4	2		1
Ag 76	9	4	3		2	9	4	3		2	9	4	3		2
Ag 77	11	9	1		1	11	9	1		1	11	9	1		1
Ag 78	11	11				11	11				11	11
Ag 79 *	17	14	1		2	17	14	1		2	17	14	1		2
Ag 80 *	17	14	1		2	17	14	1		2	17	14	1		2
Ag 81	12	7	2		3	12	7	2		3	12	7	2		3
Ag 82	1	1				1	1				1	1
Ag 83	11	8	2		1	11	8	2		1	11	8	2		1
Ag 84	9	8			1	9	8			1	9	8			1
Ag 85	11	9		1	1	11	9		1	1	11	9		1	1
Ag 86	82	73		2	7	82	73		2	7	82	73		2	7
Ag 87 *	17	14	1		2	17	14	1		2	17	14	1		2
Ag 88 *	17	14	1		2	17	14	1		2	17	14	1		2
Ag 89	11	9		1	1	11	9		1	1	11	9		1	1
Ag 90	1	1				1	1				1	1
Ag 91	11	6	2		3	11	6	2		3	11	6	2		3
Ag 92	16	14			2	16	14			2	16	14			2
Ag 93	8	8				8	8				8	8
Ag 94	12	11			1	12	11			1	12	11			1
Ag 95 *	17	14	1		2	17	14	1		2	17	14	1		2
Ag 96 *	10	8			2	10	8			2	10	8			2
Total	587	469	38	10	70	587	469	38	10	70	587	469	38	10	70
*	Inter/intra run controls
	Samples with unique variants required to satisfy the ACSG guidelines

## Sheet: Illumina
						TruSight Cardio panel										Custom-designed cardiac panel
	Total	Breakdown				Variant Studio					JSI					Total	SureCall					JSI
		Missense	Dels	Insertions/dups	Intronic	Total	Missense	Dels	Insertions/dups	Intronic	Total	Missense	Dels	Insertions/dups	Intronic		Total #	Missense	Dels	Insertions/dups	Intronic	Total #	Missense	Dels	Insertions/dups	Intronic
Ill 1	10	8			2	8	8				10	8			2	Ag 2	10	8			2	10	8			2
Ill 2	2		1	1		0					2		1	1		Ag 13	1		1			2		1	1
Ill 3	9	8	1			8	8				9	8	1			Ag 8	9	8	1			9	8	1
Ill 4	11	9	1		1	10	9	1			10	9	1			Ag 10	11	9	1		1	11	9	1		1
Ill 5 *	10	8			2	8	8				10	8			2	Ag 14 *	10	8			2	10	8			2
Ill 6	11	6	4		1	7	6	1			11	6	4		1	Ag 37	11	6	4		1	11	6	4		1
Ill 7	1			1		0					1			1		Ag 33	1			1		1			1
Ill 8	20	11			9	11	11				20	11			9	Ag 28	20	11			9	20	11			9
Ill 9 *	17	14	1		2	14	14				17	14	1		2	Ag 39 *	17	14	1		2	17	14	1		2
Ill 10	66	50	2	1	13	50	50				66	50	2	1	13	Ag 19	66	50	2	1	13	65	49	2	1	13
Ill 11	1		1			1		1			1		1			Ag 17	1		1			1		1
Ill 12	30	27	1		2	27	27				30	27	1		2	Ag 20	30	27	1		2	30	27	1		2
Ill 13	11	10			1	10	10				11	10			1	Ag 16	11	10			1	11	10			1
Ill 14	5	3	1		1	4	3	1			4	3	1			Ag 9	5	3	1		1	5	3	1		1
Ill 15	17	9			8	9	9				17	9			8	Ag 30	17	9			8	17	9			8
Ill 16	1		1			0					0					Ag 41	1		1			0
Ill 17	11	11				11	11				11	11				Ag 42	11	11				9	9
Ill 18	12	11			1	11	11				12	11			1	Ag 12	12	11			1	12	11			1
Ill 19	14	11	1		2	12	11	1			14	11	1		2	Ag 15	14	11	1		2	14	11	1		2
Ill 20	33	27	3		3	29	27	2			33	27	3		3	Ag 36	33	27	3		3	33	27	3		3
Ill 21	13	9	3		1	9	9				13	9	3		1	Ag 38	13	9	3		1	13	9	3		1
Ill 22	17	12	3		2	12	12				17	12	3		2	Ag 44	17	12	3		2	17	12	3		2
Ill 23	36	30	2		4	30	30				36	30	2		4	Ag 43	36	30	2		4	36	30	2		4
Ill 24	15	11	2		2	11	11				15	11	2		2	Ag 50	15	11	2		2	15	11	2		2
Ill 25	10	9		1		10	9		1		10	9		1		Ag 66	10	9		1		10	9		1
Ill 26	12	7	2		3	7	7				12	7	2		3	Ag 81	12	7	2		3	12	7	2		3
Ill 27	16	14			2	14	14				16	14			2	Ag 92	16	14			2	16	14			2
Ill 28	9	7		1	1	7	7				9	7		1	1	Ag 58	9	7		1	1	9	7		1	1
Ill 29 *	17	14	1		2	14	14				17	14	1		2	Ag 6 *	17	14	1		2	17	14	1		2
Ill 30	32	27	2	1	2	28	27		1		31	27	2		2	Ag 68	32	27	2	1	2	32	27	2	1	2
Ill 31	15	10	2	1	2	10	10				15	10	2	1	2	Ag 61	15	10	2	1	2	15	10	2	1	2
Ill 32	82	73		2	7	74	73		1		82	73		2	7	Ag 86	82	73		2	7	82	73		2	7
Ill 33	7	6	1			7	6	1			6	6	1			Ag 74	7	6	1			7	6	1
Ill 34 *	10	8			2	8	8				10	8			2	Ag 23 *	10	8			2	10	8			2
Ill 35	1			1		1			1		1			1		Ag 62	1			1		1			1
Total	584	460	36	10	78	473	461	8	4	0	580	461	35	9	76	Total	583	460	36	9	76	580	457	35	10	76
*	Inter/intra run controls

## Sheet: Reads per sample Agilent
Agilent Iteration 1	Total reads		Agilent Iteration 2	Total reads		Agilent Iteration 3	Total reads
Ag 1	1140395		Ag 17	1295578		Ag 49	910822
Ag 2	572069		Ag 18	1359442		Ag 50	969101
Ag 3	857861		Ag 19	1577527		Ag 51	844338
Ag 4	897763		Ag 20	1541051		Ag 52	991893
Ag 5	900958		Ag 21	1946314		Ag 53	833797
Ag 6 *	897836		Ag 22	1281900		Ag 54	811557
Ag 7	819950		Ag 23 *	1838548		Ag 55 *	820912
Ag 8	1259273		Ag 24 *	1184136		Ag 56 *	804516
Ag 9	938578		Ag 25	1445821		Ag 57	834407
Ag 10	1153395		Ag 26	1304533		Ag 58	957525
Ag 11	1308292		Ag 27	1190548		Ag 59	929508
Ag 12	955520		Ag 28	1531001		Ag 60	825266
Ag 13	827400		Ag 29	1609593		Ag 61	808993
Ag 14 *	960541		Ag 30	1258586		Ag 62	802566
Ag 15	1242166		Ag 31 *	1191743		Ag 63 *	799512
Ag 16	1052551		Ag 32 *	1956492		Ag 64 *	876350
			Ag 33	1760730		Ag 65	744249
			Ag 34	1291210		Ag 66	867554
			Ag 35	1214111		Ag 67	922242
			Ag 36	1445049		Ag 68	788107
			Ag 37	1331856		Ag 69	881867
			Ag 38	1305027		Ag 70	828164
			Ag 39 *	1389786		Ag 71 *	773770
			Ag 40 *	1134138		Ag 72 *	649209
			Ag 41	2105033		Ag 73	978449
			Ag 42	2801814		Ag 74	772118
			Ag 43	1456931		Ag 75	725467
			Ag 44	1769595		Ag 76	880984
			Ag 45	1582834		Ag 77	844302
			Ag 46	2433516		Ag 78	768589
			Ag 47 *	1784758		Ag 79 *	744359
			Ag 48 *	1610804		Ag 80 *	850722
						Ag 81	1249298
						Ag 82	1364747
						Ag 83	1306944
						Ag 84	1320626
						Ag 85	1213189
						Ag 86	1210498
						Ag 87 *	1245358
						Ag 88 *	1127084
						Ag 89	1313035
						Ag 90	1377938
						Ag 91	1438073
						Ag 92	1414790
						Ag 93	1263844
						Ag 94	1359658
						Ag 95 *	1480963
						Ag 96 *	1483193

## Sheet: Reads per sample Illumina
	Total reads
Ill 1	3501820
Ill 2	2703082
Ill 3	4178765
Ill 4	1933371
Ill 5 *	2521649
Ill 6	2529065
Ill 7	3186008
Ill 8	2090155
Ill 9 *	4183438
Ill 10	3101337
Ill 11	3559244
Ill 12	2068981
Ill 13	1362576
Ill 14	4061588
Ill 15	1390656
Ill 16	1875052
Ill 17	2065592
Ill 18	3243265
Ill 19	3862214
Ill 20	3244775
Ill 21	960540
Ill 22	2977341
Ill 23	2196291
Ill 24	2503597
Ill 25	3273273
Ill 26	4328924
Ill 27	2297159
Ill 28	2829654
Ill 29 *	2430087
Ill 30	1313501
Ill 31	1539291
Ill 32	2355084
Ill 33	1317145
Ill 34 *	2674636
Ill 35	2658716
